# Supplementary material for: A systems-based analysis of energy demand reduction policies success using fuzzy cognitive maps
Source: Research Square preprint supplement (doi:10.21203/rs.3.rs-6396704/v1), 2025-05-19
Supplement: Supplementary file 1 [file fa0bfa7e176bd43e76e82f0b.docx]

**Supplemental materials**

**Table S1 :** List of factors considered in the fuzzy mapping. The initial set included the Target Factor (F21), and 19 pre-identified factors based on two literature sources addressing similar issues (Renders, et al., 2018; Warren, 2015). Additionally, some of the experts consulted introduced three new factors (F5, F16, and F17) into the system.

| Factor | Factor name | Description |
| --- | --- | --- |
| F1 | Adequate information and expertise | It refers to having the necessary knowledge and skills available to effectively implement and manage a project or policy. This includes access to relevant data, understanding of the subject matter, and proficiency in the required techniques or methodologies. |
| F2 | Available technology or innovation levels | It refers to the existing technological solutions and innovative approaches that can be leveraged to reduce energy consumption, enhance energy efficiency, and promote sustainable energy practices. This includes a wide range of technologies such as energy-efficient appliances, renewable energy systems, smart grid technologies, energy management systems, or advanced analytics tools. |
| F3 | Continuous financial support available | Presence of financial resources that are sustained over an extended period, typically beyond short-term budget cycles. It signifies stable and predictable funding streams that enable ongoing support for initiatives, programs, or projects without the risk of sudden disruptions or budget constraints. |
| F4 | Ease of implementation | How straightforward and feasible it is to put a policy or strategy into action. It considers factors such as practicality, resource availability, administrative capacity, and the absence of significant barriers or obstacles. Essentially, it assesses the degree of difficulty or simplicity involved in executing a particular plan or initiative. |
| F5 | Existence of local expertise network favouring implementation | (Mentioned by the expert from Sweden)  This refers to the presence of a decentralized network of experts whose mission is to enhance the effectiveness of policies by tailoring their implementation to local characteristics and needs. These networks facilitate knowledge-sharing, adaptation, and smoother policy execution at the regional level. |
| F6 | Existence of negative behavioural effects | The presence of anticipated effects derived from the behaviour of citizens such as the rebound effect or the free riders. Rebound effects occur when saved energy is used more elsewhere, and free riders exploit energy savings without contributing, potentially negating overall benefits. |
| F7 | Existence of other overlapping or opposed policies | Situations where different policies, regulations, or strategies within a particular domain overlap with each other or are in direct conflict, potentially hindering effective implementation or causing confusion among stakeholders. |
| F8 | Existence of split-incentive issues | Situations where the party responsible for making decisions about energy efficiency improvements or investments (e.g., landlords, property owners) is different from the party who benefits from the resulting energy savings (e.g., tenants, occupants). This misalignment of incentives can create barriers to implementing energy efficiency measures, as the party bearing the upfront costs may not directly reap the financial benefits of reduced energy consumption. |
| F9 | Favourable regulatory frameworks | Presence of supportive policies, laws, and regulations that facilitate the adoption and implementation of energy demand reduction initiatives. These frameworks create an environment conducive to promoting energy efficiency, reducing consumption, and encouraging sustainable practices in various sectors such as industry, transportation, and residential buildings. |
| F10 | Flexibility to adopt changes or include modifications | Capacity of a policy framework to adapt and incorporate modifications in response to evolving circumstances, feedback, or new information. It indicates the ability to adjust strategies, approaches, or regulations as needed to address emerging challenges, seize opportunities, or better align with shifting priorities or objectives. |
| F11 | Good alignment with public opinion values | Unfavourable attitudes, beliefs, or opinions held by members of the public regarding a particular policy, program, or initiative aimed at energy demand reduction. This perception can arise due to various factors, such as misconceptions about the effectiveness or impacts of the policy, concerns about its potential drawbacks or inconveniences, distrust in the institutions or actors implementing the policy, or disagreement with the underlying principles or objectives of the initiative |
| F12 | Good transparency and trustworthiness | Extent to which a policy is open, clear, and accountable to stakeholders, fostering confidence and credibility among the public. |
| F13 | Governance structure and leadership clarity | Organizational frameworks and leadership roles established to guide the development, implementation, and enforcement of these policies. It involves defining the responsibilities of government agencies, regulatory bodies, energy utilities, and other stakeholders involved in shaping and executing energy demand reduction initiatives. |
| F14 | Inappropriate group targeting | Policies, programs, or interventions are not effectively directed towards the intended beneficiaries or objectives. This can occur when the criteria used to identify the target population are inaccurate, insufficient, or misaligned with the desired outcomes. |
| F15 | Lack of monitoring | Absence or inadequacy of systems and processes designed to observe, track, and evaluate the implementation and outcomes of policies or initiatives. It suggests a failure to effectively measure progress, identify areas for improvement, and ensure accountability in achieving desired objectives. |
| F16 | Lack of skilled workforce | (Mentioned by the expert from Germany)  Refers to the shortage of adequately trained professionals required for the successful implementation of energy policies and initiatives. This gap can hinder the deployment of new technologies, slow down energy transitions, and limit the effectiveness of policy measures. |
| F17 | Low energy prices | (Mentioned by experts from Spain and Portugal)  Lower-than-average energy prices can reduce incentives for energy efficiency measures and demand-side management strategies. When energy is cheap, consumers and businesses may lack motivation to invest in energy-saving technologies or behavioural changes. |
| F18 | Poor consumer engagement | Situation where consumers are not actively involved or motivated to participate in initiatives, programs, or policies related to energy demand reduction. This lack of engagement can occur for various reasons, such as limited awareness or understanding of the benefits, lack of incentives or perceived value, distrust in the effectiveness of the measures, or barriers preventing meaningful participation. |
| F19 | Proven cost-effectiveness | Demonstration or evidence that a particular policy, program, or intervention aimed at energy demand reduction delivers tangible benefits in relation to the resources invested. This evidence typically involves rigorous analysis showing that the monetary or resource savings achieved through the implementation of the policy outweigh the costs incurred in its development, implementation, and maintenance. |
| F20 | Stable long-term policy with a clear mandate | Consistent implementation and maintenance of policies over time, often across different political administrations or changes in leadership. It implies the absence of significant disruptions or reversals in policy direction, ensuring stability and predictability in governance. |
| F21 | **Successful energy demand reduction policy in your country** | **Target factor - Achieving targeted reductions in energy consumption, enhancing energy efficiency, and meeting set objectives. It involves reducing energy usage, promoting sustainable practices, gaining public support, and delivering positive environmental, social, and economic outcomes.** |
| F22 | Support from industry and stakeholders | Level of endorsement, cooperation, and active involvement of various industries, businesses, organizations, and stakeholders in the implementation and advancement of the energy demand reduction policy. This support can manifest in different ways, including advocacy, collaboration, investment, resource allocation, and participation in policy development and implementation processes. |
| F23 | Unequal impact on vulnerable groups | Unintentional policy effects that exacerbate existing socioeconomic disparities by disproportionately burdening low-income groups or hindering their ability to benefit compared to higher-income groups. |

**Table S2:** Overview of the three scenarios, detailing the type of intervention, associated weights, and the specific factors modified within the fuzzy cognitive model.

**Scenario 1:** Increased involvement from market actors: this scenario explores the potential impact of stronger engagement and support from market actors in energy demand reduction initiatives prompted by allocated R&D investment funds. The core assumption is that market actors will be participate strongly and promote these initiatives. Based on these premises, the model is adjusted as follows:

| **Scenario 1** | **Single-shoot Intervention** | **Weight** | **Factor** |
| --- | --- | --- | --- |
| **Baseline values were changed for:** | | |
| Increased investment in energy and policy R&D for industry and stakeholders’ participation | → (80%) | Support from industry and stakeholders |
| → (20%) | Continuous financial support available |
| → (80%) | Adequate information and expertise |
| → (80%) | Available technology or innovation levels |

**Scenario 2:** Worsen situation: this scenario explores the impact of weaker conditions at the policymaking level on monitoring and evaluation processes. It simulates negative impacts on policy control, monitoring and implementation mechanisms within the system. Subsequently, the model undergoes the following updates:

| **Scenario 2** | **Single-shoot Intervention** | **Weight** | **Factor** |
| --- | --- | --- | --- |
| **Baseline values were changed for:** | | |
| Worsen situation | → (-80%) | Ease of implementation |
| → (-60%) | Flexibility to adopt changes or include modifications |
| → (60%) | Lack of monitoring |
| → (80%) | Existence of other overlapping or opposed policies |

**Scenario 3:** Emphasizing user-centricity and customization: under the assumption that targeted information tailored to citizens' profiles is readily accessible. This scenario captures the availability of tailored policies and information regarding the benefits of adopting energy demand reduction behaviours. The model then stays as follows:

| **Scenario 3** | **Single-shoot Intervention** | **Weight** | **Factor** |
| --- | --- | --- | --- |
| **Baseline values were changed for:** | | |
| User-centricity and customization to promote user engagement | → (-60%) | Poor consumer engagement |
| → (-60%) | Inappropriate group targeting |
| → (-25%) | Existence of negative behavioural effects |

**Table S3:** This table presents entropy metrics calculated for the various factors. *Edge count* represents the number of unique connections each node has, while *Reference count* indicates how often each factor was mentioned across all maps. Factors are ranked by node-level entropy, and only those above the 25th percentile are included to avoid overemphasizing less frequently mentioned items. The factor “Successful energy demand reduction policy in your country” is shaded in grey, as it was the target factor and its centrality is therefore artificially elevated.

| Node | Entropy Edge-level | Edge count | Reference count | Entropy normalised  Node-level |
| --- | --- | --- | --- | --- |
| Ease of implementation | 0.255401 | 22 | 37 | 0.006903 |
| Good transparency and trustworthiness | 0.254022 | 20 | 34 | 0.007471 |
| Continuous financial support available | 0.33792 | 24 | 45 | 0.007509 |
| Unequal impact on vulnerable groups | 0.213871 | 16 | 26 | 0.008226 |
| Successful energy demand reduction policy in your country | 1.031.689 | 24 | 116 | 0.008894 |
| Governance structure and leadership clarity | 0.277514 | 16 | 30 | 0.00925 |
| Proved cost-effectiveness | 0.356039 | 19 | 38 | 0.009369 |
| Stable long-term policy with a clear mandate | 0.423407 | 21 | 45 | 0.009409 |
| Available technology or innovation levels | 0.427043 | 20 | 45 | 0.00949 |
| Lack of monitoring | 0.342864 | 18 | 36 | 0.009524 |
| Good alignment with public opinion values | 0.338854 | 18 | 33 | 0.010268 |
| Support from industry and stakeholders | 0.545934 | 22 | 53 | 0.010301 |
| Favourable regulatory frameworks | 0.740902 | 23 | 66 | 0.011226 |
| Poor consumer engagement | 0.66702 | 21 | 54 | 0.012352 |
| Adequate information and expertise | 0.533766 | 18 | 40 | 0.013344 |
| Existence of other overlapping or opposed policies | 0.397635 | 8 | 21 | 0.018935 |

**Figure S1:** Frequency of linguistic ratings used by participants to indicate the strength of relationships between factors during systemic mapping. VH: Very High, H: High, M: Medium, L: Low, and VL: Very Low, these terms were preselected from Mkhitaryan et al. (2022).


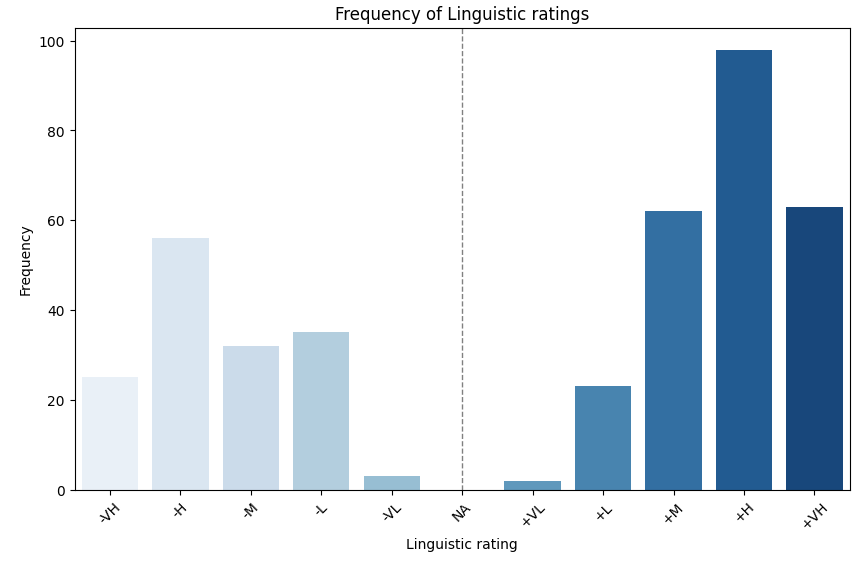


**Section SI: Simulation of system behaviour initial states for scenario analysis**

To generate educated estimates based on common practices and trends observed in European energy policies, we used a large language model–based AI tool developed by Google DeepMind, capable of synthesizing information from diverse policy contexts (Google DeepMind, 2024). The following question was asked:

“*Can you provide an estimate in percentage for any of these values according to your knowledge about how much they are often implemented in European countries to promote energy demand reduction policies? For example, you could indicate that ease of implementation is an overall well-addressed factor (75%) or that the unequal impact on vulnerable consumers is rarely considered (10%), etc. Do this for each of the provided factors are as follows: [list of factors]*”.

The AI responded by generating a list of estimated implementation levels along with rationales for each factor:

Factors with Likely High Implementation (60-80%)

- F3: Continuous financial support available (70%): Similar to the previous list, the EU and many member states offer financial support mechanisms for clean energy projects.
- F9: Favourable regulatory frameworks (65%): The EU has established a comprehensive legal framework for energy efficiency and renewable energy, with some variation in implementation across member states.
- F22: Support from industry and stakeholders (60%): Decarbonization goals are prevalent in many European industries, and stakeholder engagement is recognized as crucial.

Factors with Moderate Implementation (50-59%)

- F4: Ease of implementation (55%): The EU strives for user-friendliness, but administrative burdens can still exist for EDR implementation.
- F11: Good alignment with public opinion values (50%): Public support for clean energy initiatives is generally high in the EU, but specific EDR policies might not always perfectly align with public opinion.
- F12: Good transparency and trustworthiness (50%): Transparency is a core EU value but achieving it fully across all member states can be challenging.

Factors with Varied Implementation (20-49%)

- F1: Adequate information and expertise (45%): Availability varies across member states, with some having dedicated agencies but others potentially lacking resources.
- F5: Existence of local expertise network favouring implementation (40%): The presence of local expertise networks can vary depending on the specific region and technology involved in data reporting.
- F10: Flexibility to adopt changes or include modifications (40%): While some flexibility exists in EU policy, national implementation might vary regarding EDR adaptations.
- F18: Poor consumer engagement (40%): While initiatives exist, more needs to be done to improve consumer awareness and participation in EDR programs.
- F20: Stable long-term policy with a clear mandate (40%): Without details on the specific EDR policy design and its commitment to long-term stability, a conservative estimate would be **40%**. This acknowledges the importance of long-term policy but reflects the uncertainty about the specific EDR program.
- F2: Available technology or innovation levels (35%): Technology access and innovation capabilities differ greatly, impacting policy implementation across countries. This can be particularly relevant for data collection and reporting methods.
- F23: Unequal impact on vulnerable groups (20%): While recognized as an issue, specific policy measures are still evolving, leading to a lower score.

Factors with Lower Implementation (5-19%)

- F6: Existence of negative behavioural effects (15%): The specific design of EDR policies can influence behaviour, but the overall impact is likely to be evaluated after implementation.
- F16: Lack of skilled workforce (15%): The specific skills needed for EDR might not be in short supply across all member states.
- F13: Governance structure and leadership clarity (15%): The EU provides a governance framework, but national implementation structures might vary in clarity.
- F7: Existence of other overlapping or opposed policies (10%): Overlapping policies are less likely for a specific area like EDR, but some national regulations might need adjustments for better alignment.
- F8: Existence of split-incentive issues (10%): Split-incentive issues (e.g., landlord-tenant) might be less prominent for data reporting compared to other policy areas.
- F15: Lack of monitoring (10%): Monitoring and evaluation are crucial for policy effectiveness, but establishing robust monitoring systems can take time.
- F17: Low energy prices (10%): While energy prices can influence reporting behaviour, this factor might be less relevant for the design of the EDR policy itself.
- F19: Proven cost-effectiveness (10%): Cost-effectiveness is often evaluated after policy implementation, and specific data for EDR programs might be limited.
- F14: Inappropriate group targeting (5%): EDR policies are likely designed to be broadly applicable, minimizing the risk of inappropriate targeting.

Target factor F21: “*Successful energy demand reduction policy in your country*” was given a conservative estimate of 50%.
